# Supplementary material for: Dynamic sumoylation of promoter-bound general transcription factors facilitates transcription by RNA polymerase II
Source: PubMed Central journal article supplement (PMC8505008; doi:10.1371/journal.pgen.1009828), 2021-09-29
Supplement: pgen.1009828.s011.pdf [file pgen.1009828.s011.pdf]

**S7 Table. Analysis details for RNA-seq in Tfg1-HA vs. Tfg1-K60,61R-HA strains**

| <b>RNA-seq in Tfg1-HA and Tfg1-K60,61R-HA strains</b> |                                                                                                                                                                                                                                                        |
|-------------------------------------------------------|--------------------------------------------------------------------------------------------------------------------------------------------------------------------------------------------------------------------------------------------------------|
| Samples and conditions                                | Two independent replicates were prepared from cultures grown in SC medium at 30°C.<br>1 – Tfg1-HA<br>2 – Tfg1-K60,61R                                                                                                                                  |
| Library synthesis                                     | NEB Ultra II directional mRNA library prep (PolyA enrichment)                                                                                                                                                                                          |
| Sequencing                                            | Illumina HiSeq 2500; Paired-end reads; 2x 126 nt; 30 million reads/sample                                                                                                                                                                              |
| Quality control                                       | FastQC (0.11.9)                                                                                                                                                                                                                                        |
| Genome alignment                                      | HISAT2 (2.1.0)<br><b>Parameters:</b> Default options; UCSC annotaion file: sacCer3.ncbiRefSeq.gtf                                                                                                                                                      |
| Transcript counting                                   | Transcripts counted using featureCounts from Subread (2.0.0)<br><b>Parameters:</b> Default options; -p (paired)                                                                                                                                        |
| Differential expression analysis                      | edgeR (3.32.1)<br><b>Parameters:</b> Library sizes were normalized using calcNormFactors; dispersions were estimated with estimateDisp with robust argument; likelihood ratio tests for differential expression were performed with glmFit and glmLRT. |
